# Supplementary material
Source: HighWire-hosted journal article supplement (doi:10.1101/rna.073601.119)
Supplement: Supplemental_Calculation_1.docx [file Supplemental_Calculation_1.docx]

**SUPPLEMENTAL CALCULATION #1**

Numbers:

U-2 OS volume: 4000 µm3 (Beck et al. 2011)

Nuclei volume: 400 µm3 (10% of cell volume (Alberts 2002))

Average mature mRNA length: 3392 nucleotides (Piovesan et al. 2016)

Average premature mRNA length: 66700 nucleotides (Piovesan et al. 2016)

Number of mRNAs in the cytoplasm: 330,000 (Khong et al. 2017)

Number of mRNAs in the nucleus: 3,300 (1% of the cytoplasmic number)

110 of the most abundant RNA-BP in U-2 OS cells (Beck et al. 2011)

Fraction of RNA-BP in nucleus versus cytoplasm in Xenopus oocyte (Wühr et al. 2015)

*If gene ID is not found, nuclei annotated proteins are assigned a value of 0.9 ratio (Nuclei/Total), cytoplasmic annotated proteins are assigned a value of 0.1 ratio (Nuclei/Total), and nuclei/cytoplasmic annotated proteins are assigned a value of 0.5 ratio (Nuclei/Total).

Total copy number of 110 most abundant RNA-BP in the nucleus = SUM [Copies per cell

(Beck et al. 2011) x Nuclei/Total ratio (Wühr et al. 2015)] = 5.59 x 107 proteins/nuclei

Total copy number of 110 most abundant RNA-BP in the cytoplasm = SUM [Copies per cell

(Beck et al. 2011) x (1-Nuclei/Total ratio) (Wühr et al. 2015) = 1.70 x 107  proteins/cytoplasm

[110 most abundant RNA-BP in nucleus] = 5.59 x 107 proteins / 400 µm3 =

1.4 x 105 proteins / µm3

[110 most abundant RNA-BP in cytoplasm] = 1.70 x 107 proteins / 3600 µm3 =

4.7 x 103 proteins / µm3

Ratio of 110 most abundant RNA-BP in the nucleus/cytoplasm: 1.4 x 105 proteins / µm3 / 4.7 x

103 proteins / µm3 = 29.6

[mRNA nucleotides in cytoplasm] = (330,000 mRNAs x 3392 nucleotides) / 3600 µm3 =

3.1 x 105 nucleotides / µm3

[mRNA nucleotides in nucleus] = (3,300 mRNAs x 66700 nucleotides) / 400 µm3 =

5.5 x 105 nucleotides / µm3

[mRNA nucleotides in nucleus] / [mRNA nucleotides in cytoplasm] = 1.8

Ratio of (RNA-binding proteins in nuclei /mRNA nucleotide in nuclei) / (RNA binding proteins in

cytoplasm / mRNA nucleotide in cytoplasm) = 29.6 / 1.8 = 16.7
