# Supplementary material
Source: HighWire-hosted journal article supplement (doi:10.1101/rna.073601.119)
Supplement: Supplemental_Table_S1.pdf [file Supplemental_Table_S1.pdf]

**Table S1A** Estimated mass of protein/mRNA for different ratios of protein to RNA

| mRNA length    | g/mole RNA MW         | Protein if:<br>50% protein<br>:50% RNA | Protein if:<br>60% protein<br>:40% RNA | Protein if:<br>70% protein<br>:30% RNA | Protein if:<br>80% protein<br>:20% RNA |
|----------------|-----------------------|----------------------------------------|----------------------------------------|----------------------------------------|----------------------------------------|
| <b>500</b>     | 165,000               | 165,000                                | 247,500                                | 385,000                                | 660,000                                |
| <b>1,000</b>   | 330,000               | 330,000                                | 500,000                                | 770,000                                | 1.32 x 10 <sup>6</sup>                 |
| <b>3,000</b>   | 1 x 10 <sup>6</sup>   | 1 x 10 <sup>6</sup>                    | 1.5 x 10 <sup>6</sup>                  | 2.31 x 10 <sup>6</sup>                 | 3.96 x 10 <sup>6</sup>                 |
| <b>10,000</b>  | 3.3 x 10 <sup>6</sup> | 3.3 x 10 <sup>6</sup>                  | 5 x 10 <sup>6</sup>                    | 7.7 x 10 <sup>6</sup>                  | 1.32 x 10 <sup>7</sup>                 |
| <b>20,000</b>  | 6.6 x 10 <sup>6</sup> | 6.6 x 10 <sup>6</sup>                  | 1 x 10 <sup>7</sup>                    | 1.54 x 10 <sup>7</sup>                 | 2.64 x 10 <sup>7</sup>                 |
| <b>100,000</b> | 3.3 x 10 <sup>7</sup> | 3.3 x 10 <sup>7</sup>                  | 5 x 10 <sup>7</sup>                    | 7.7 x 10 <sup>7</sup>                  | 1.32 x 10 <sup>8</sup>                 |

**Table S1B** Extrapolation of RNP composition to bound proteins and recognized RNA

|                            | Composition             | Mass of Protein    | Mass of Protein - Core | Possible Protein Mix                          | Proteins kb          | RNA bounds/kb     | % RNA bound           |
|----------------------------|-------------------------|--------------------|------------------------|-----------------------------------------------|----------------------|-------------------|-----------------------|
| <b>A) 3000 base mRNA</b>   | 40% RNA<br>:60% protein | $1.5 \times 10^6$  | $1 \times 10^6$        | a) 10 100 KD<br>b) 20 50 KD<br>c) 40 25 KD    | 3.3<br>6.6<br>13.3   | 33<br>66<br>133   | 3.3<br>6.6<br>13.3    |
|                            | 20% RNA<br>:80% Protein | $3.6 \times 10^6$  | $3.5 \times 10^6$      | a) 35 100 KD<br>b) 70 50 KD<br>c) 140 25 KD   | 11.7<br>23.3<br>47   | 117<br>233<br>470 | 12%<br>23%<br>47%     |
| <b>B) 10,000 base mRNA</b> | 40% RNA<br>:60% Protein | $5 \times 10^6$    | $4.5 \times 10^6$      | a) 45 100 KD<br>b) 90 50 KD<br>c) 180 25 KD   | 4.5<br>9.0<br>18.0   | 45<br>90<br>180   | 45%<br>9%<br>18%      |
|                            | 20% RNA<br>:80% Protein | $1.32 \times 10^7$ | $1.27 \times 10^7$     | a) 127 100 KD<br>b) 254 50 KD<br>c) 508 25 KD | 12.7<br>25.4<br>50.8 | 127<br>254<br>508 | 12.7%<br>25.4%<br>50% |

**Assumption: Any RNA-BP covers 10 bases**
