# Supplementary material
Source: HighWire-hosted journal article supplement (doi:10.1101/rna.073601.119)
Supplement: Supplemental_Table_S2.pdf [file Supplemental_Table_S2.pdf]

**Table S2. Abundance of RNA-binding proteins in U-2 OS cells**

| <i>SP_id</i> | <i>Description</i>                                                                                                                             | <i>Copies per cell</i> | <i>Predominant Localization***</i> | <i>Xenopus oocytes ratio (Nucleus/Cell)</i> |
|--------------|------------------------------------------------------------------------------------------------------------------------------------------------|------------------------|------------------------------------|---------------------------------------------|
| P09651       | Heterogeneous nuclear ribonucleoprotein A1 OS=Homo sapiens GN=HNRNPA1 PE=1 SV=4                                                                | 1.17E+07               | N                                  | 0.865162025                                 |
| P61604       | Heterogeneous nuclear ribonucleoproteins A2/B1 OS=Homo sapiens GN=HNRNPA2B1 PE=1 SV=2                                                          | 9.27E+06               | N                                  | 0.90460893                                  |
| P78371       | Nucleophosmin OS=Homo sapiens GN=NPM1 PE=1 SV=2                                                                                                | 8.95E+06               | N                                  | 0.959054472                                 |
| P08758       | Small nuclear ribonucleoprotein Sm D3 OS=Homo sapiens GN=SNRPD3 PE=1 SV=1                                                                      | 6.53E+06               | N                                  | 0.624242583                                 |
| Q15365       | Eukaryotic initiation factor 4A-I OS=Homo sapiens GN=EIF4A1 PE=1 SV=1                                                                          | 2.22E+06               | C                                  | 0.118838446                                 |
| P52565       | Poly(rC)-binding protein 1 OS=Homo sapiens GN=PCBP1 PE=1 SV=2                                                                                  | 2.09E+06               | N/C                                | 0.55038533**<br>(PCBP2 Xenopus)             |
| P63220       | Heterogeneous nuclear ribonucleoprotein K OS=Homo sapiens GN=HNRNPK PE=1 SV=1                                                                  | 1.81E+06               | N                                  | 0.893300601                                 |
| P62826       | Polypyrimidine tract-binding protein 1 OS=Homo sapiens GN=PTBP1 PE=1 SV=1                                                                      | 1.74E+06               | N                                  | 0.710984436                                 |
| P46783       | Splicing factor, arginine/serine-rich 1 OS=Homo sapiens GN=SFRS1 PE=1 SV=2                                                                     | 1.45E+06               | N                                  | 0.934528339                                 |
| P25398       | Heterogeneous nuclear ribonucleoprotein M OS=Homo sapiens GN=HNRNPM PE=1 SV=3                                                                  | 1.41E+06               | N                                  | 0.899923325                                 |
| Q02790       | Heterogeneous nuclear ribonucleoproteins C1/C2 OS=Homo sapiens GN=HNRNPC PE=1 SV=4                                                             | 1.33E+06               | N                                  | 0.929915678                                 |
| P26038       | Heterogeneous nuclear ribonucleoprotein H OS=Homo sapiens GN=HNRNPH1 PE=1 SV=4                                                                 | 1.01E+06               | N                                  | 0.90422836                                  |
| P61960       | Heterogeneous nuclear ribonucleoprotein L OS=Homo sapiens GN=HNRNPL PE=1 SV=2                                                                  | 9.86E+05               | N                                  | 0.851381525                                 |
| Q14019       | Nuclease-sensitive element-binding protein 1 OS=Homo sapiens GN=YBX1 PE=1 SV=3                                                                 | 9.25E+05               | C                                  | 0.08298431                                  |
| P07858       | Small nuclear ribonucleoprotein E OS=Homo sapiens GN=SNRPE PE=1 SV=1                                                                           | 7.95E+05               | N/C                                | 0.508898869                                 |
| Q02878       | Inosine-5'-monophosphate dehydrogenase 2 OS=Homo sapiens GN=IMPDH2 PE=1 SV=2                                                                   | 7.59E+05               | C                                  | 0.250793517                                 |
| O75506       | Poly(rC)-binding protein 2 OS=Homo sapiens GN=PCBP2 PE=1 SV=1                                                                                  | 7.28E+05               | N/C                                | 0.55038533                                  |
| P25789       | Small nuclear ribonucleoprotein Sm D2 OS=Homo sapiens GN=SNRPD2 PE=1 SV=1                                                                      | 7.09E+05               | N/C                                | 0.503074085                                 |
| P61916       | ATP-dependent RNA helicase DDX1 OS=Homo sapiens GN=DDX1 PE=1 SV=2                                                                              | 6.23E+05               | N/C                                | 0.449938253                                 |
| P60981       | Small nuclear ribonucleoprotein G-like protein OS=Homo sapiens PE=3 SV=2, Small nuclear ribonucleoprotein G OS=Homo sapiens GN=SNRPG PE=1 SV=1 | 5.96E+05               | N/C                                | 0.475710614                                 |
| P43487       | Nucleolin OS=Homo sapiens GN=NCL PE=1 SV=3                                                                                                     | 5.71E+05               | N                                  | 0.958186334                                 |
| Q9P258       | Polyadenylate-binding protein 1 OS=Homo sapiens GN=PABPC1 PE=1 SV=2                                                                            | 5.48E+05               | C                                  | 0.087638267                                 |
| Q9UK76       | Heterogeneous nuclear ribonucleoprotein H3 OS=Homo sapiens GN=HNRNPH3 PE=1 SV=2                                                                | 5.14E+05               | N                                  | 0.90422836                                  |
| P63000       | Probable ATP-dependent RNA helicase DDX5 OS=Homo sapiens GN=DDX5 PE=1 SV=1                                                                     | 4.91E+05               | N                                  | 0.9009544                                   |
| Q96C19       | Matrin-3 OS=Homo sapiens GN=MATR3 PE=1 SV=2                                                                                                    | 4.58E+05               | N                                  | 0.834105493                                 |
| Q9Y3F4       | Heterogeneous nuclear ribonucleoprotein U OS=Homo sapiens GN=HNRNPU PE=1 SV=6                                                                  | 4.52E+05               | N                                  | 0.932842549                                 |
| P38646       | Ras GTPase-activating protein-binding protein 1 OS=Homo sapiens GN=G3BP1 PE=1 SV=1                                                             | 4.31E+05               | C                                  | 0.047763829                                 |
| P07741       | ATP-dependent RNA helicase A OS=Homo sapiens GN=DHX9 PE=1 SV=4                                                                                 | 4.13E+05               | N                                  | 0.918895601                                 |
| Q99623       | Small nuclear ribonucleoprotein Sm D1 OS=Homo sapiens GN=SNRPD1 PE=1 SV=1                                                                      | 4.02E+05               | N/C                                | 0.426738706                                 |
| Q8WUH6       | rRNA 2'-O-methyltransferase fibrillarin OS=Homo sapiens GN=FBL PE=1 SV=2                                                                       | 3.85E+05               | N                                  | 0.933957181                                 |
| P31150       | Protein mago nashi homolog 2 OS=Homo sapiens GN=MAGOHB PE=1 SV=1                                                                               | 3.47E+05               | N                                  | 0.920138519                                 |
| P84090       | Small nuclear ribonucleoprotein-associated proteins B and B' OS=Homo sapiens GN=SNRPB PE=1 SV=2                                                | 3.38E+05               | N                                  | 0.90*                                       |
| Q14376       | Heterogeneous nuclear ribonucleoprotein D0 OS=Homo sapiens GN=HNRNPD PE=1 SV=1                                                                 | 3.31E+05               | N                                  | 0.668590832                                 |
| O43809       | Heterogeneous nuclear ribonucleoprotein F OS=Homo sapiens GN=HNRNPF PE=1 SV=3                                                                  | 3.29E+05               | N                                  | 0.90*                                       |
| P53004       | Eukaryotic initiation factor 4A-III OS=Homo sapiens GN=EIF4A3 PE=1 SV=4                                                                        | 3.28E+05               | N                                  | 0.943525213                                 |

|        |                                                                                                       |          |     |                                   |
|--------|-------------------------------------------------------------------------------------------------------|----------|-----|-----------------------------------|
| P13987 | Cleavage and polyadenylation specificity factor subunit 5 OS=Homo sapiens GN=NUDT21 PE=1 SV=1         | 3.26E+05 | N   | 0.935487901                       |
| P78417 | Eukaryotic initiation factor 4A-II OS=Homo sapiens GN=EIF4A2 PE=1 SV=2                                | 2.91E+05 | C   | 0.10*                             |
| P18206 | Putative pre-mRNA-splicing factor ATP-dependent RNA helicase DHX15 OS=Homo sapiens GN=DHX15 PE=1 SV=2 | 2.80E+05 | N   | 0.952962041                       |
| P41567 | RNA-binding protein Raly OS=Homo sapiens GN=RALY PE=1 SV=1                                            | 2.66E+05 | N   | 0.90*                             |
| Q9POL0 | Splicing factor, arginine/serine-rich 9 OS=Homo sapiens GN=SFRS9 PE=1 SV=1                            | 2.64E+05 | N   | 0.90*                             |
| Q9UHX1 | Splicing factor U2AF 65 kDa subunit OS=Homo sapiens GN=U2AF2 PE=1 SV=4                                | 2.62E+05 | N   | 0.957950656                       |
| P62330 | Poly(U)-binding-splicing factor PUF60 OS=Homo sapiens GN=PUF60 PE=1 SV=1                              | 2.59E+05 | N   | 0.828304238                       |
| P15374 | Heterogeneous nuclear ribonucleoprotein D-like OS=Homo sapiens GN=HNRPDL PE=1 SV=3                    | 2.51E+05 | N   | 0.867710595                       |
| O14980 | Spliceosome RNA helicase BAT1 OS=Homo sapiens GN=BAT1 PE=1 SV=1                                       | 2.46E+05 | N   | 0.916415506**<br>(DDX39A Xenopus) |
| P45973 | Heterogeneous nuclear ribonucleoprotein A0 OS=Homo sapiens GN=HNRNPA0 PE=1 SV=1                       | 2.32E+05 | N   | 0.846837544                       |
| P30085 | Heterogeneous nuclear ribonucleoprotein G OS=Homo sapiens GN=RBMX PE=1 SV=3                           | 2.31E+05 | N   | 0.87785011                        |
| Q9NRV9 | Probable ATP-dependent RNA helicase DDX6 OS=Homo sapiens GN=DDX6 PE=1 SV=2                            | 2.30E+05 | C   | 0.044246624                       |
| O00571 | RNA-binding protein 8A OS=Homo sapiens GN=RBM8A PE=1 SV=1                                             | 2.30E+05 | N   | 0.932722991                       |
| P61086 | ATP-dependent RNA helicase DDX3X OS=Homo sapiens GN=DDX3X PE=1 SV=3                                   | 2.29E+05 | C   | 0.06897971                        |
| P46063 | U1 small nuclear ribonucleoprotein A OS=Homo sapiens GN=SNRPA PE=1 SV=3                               | 2.28E+05 | N   | 0.889650291                       |
| P31689 | Heterogeneous nuclear ribonucleoprotein A/B OS=Homo sapiens GN=HNRNPAB PE=1 SV=2                      | 2.12E+05 | N   | 0.939315251                       |
| Q92945 | Heterogeneous nuclear ribonucleoprotein H2 OS=Homo sapiens GN=HNRNPH2 PE=1 SV=1                       | 2.10E+05 | N   | 0.819071413                       |
| O15231 | U6 snRNA-associated Sm-like protein LSm6 OS=Homo sapiens GN=LSM6 PE=1 SV=1                            | 2.07E+05 | N   | 0.727860602                       |
| P61019 | Zinc finger protein 185 OS=Homo sapiens GN=ZNF185 PE=1 SV=2                                           | 2.06E+05 | N/C | 0.50*                             |
| Q96K17 | Heterogeneous nuclear ribonucleoprotein R OS=Homo sapiens GN=HNRNPR PE=1 SV=1                         | 2.05E+05 | N   | 0.934712831                       |
| Q99622 | Putative RNA-binding protein 3 OS=Homo sapiens GN=RBM3 PE=1 SV=1                                      | 2.04E+05 | N/C | 0.50*                             |
| P04843 | U6 snRNA-associated Sm-like protein LSm2 OS=Homo sapiens GN=LSM2 PE=1 SV=1                            | 1.90E+05 | N   | 0.756640716                       |
| Q13185 | Heterogeneous nuclear ribonucleoprotein Q OS=Homo sapiens GN=SYNCRIP PE=1 SV=2                        | 1.82E+05 | N   | 0.833363577                       |
| Q13148 | Probable ATP-dependent RNA helicase DDX17 OS=Homo sapiens GN=DDX17 PE=1 SV=1                          | 1.81E+05 | N   | 0.886419022                       |
| Q15907 | Nucleolar RNA helicase 2 OS=Homo sapiens GN=DDX21 PE=1 SV=5                                           | 1.71E+05 | N   | 0.829116847                       |
| P53396 | H/ACA ribonucleoprotein complex subunit 2 OS=Homo sapiens GN=NHP2 PE=1 SV=1                           | 1.66E+05 | N   | 0.953300309                       |
| Q9Y5B9 | Pre-mRNA-processing factor 19 OS=Homo sapiens GN=PRPF19 PE=1 SV=1                                     | 1.66E+05 | N   | 0.908422812                       |
| Q13155 | Splicing factor 3 subunit 1 OS=Homo sapiens GN=SF3A1 PE=1 SV=1                                        | 1.62E+05 | N   | 0.958534649                       |
| P35637 | U6 snRNA-associated Sm-like protein LSm8 OS=Homo sapiens GN=LSM8 PE=1 SV=3                            | 1.61E+05 | N   | 0.932400133**<br>(NAA38 xenopus)  |
| P07951 | RNA-binding protein FUS OS=Homo sapiens GN=FUS PE=1 SV=1                                              | 1.60E+05 | N   | 0.90*                             |
| P33993 | 116 kDa U5 small nuclear ribonucleoprotein component OS=Homo sapiens GN=EFTUD2 PE=1 SV=1              | 1.55E+05 | N/C | 0.566617869                       |
| P07205 | H/ACA ribonucleoprotein complex subunit 3 OS=Homo sapiens GN=NOP10 PE=1 SV=1                          | 1.47E+05 | N   | 0.87782334                        |
| P09874 | ATP-dependent RNA helicase DDX18 OS=Homo sapiens GN=DDX18 PE=1 SV=2                                   | 1.42E+05 | N   | 0.939811444                       |
| O95816 | Probable ATP-dependent RNA helicase DDX47 OS=Homo sapiens GN=DDX47 PE=1 SV=1                          | 1.40E+05 | N   | 0.929613598                       |
| Q8NBS9 | Heterogeneous nuclear ribonucleoprotein U-like protein 1 OS=Homo sapiens GN=HNRNPUL1 PE=1 SV=2        | 1.37E+05 | N   | 0.805769234                       |
| Q09666 | RNA-binding protein 39 OS=Homo sapiens GN=RBM39 PE=1 SV=2                                             | 1.36E+05 | N   | 0.947663056                       |

|        |                                                                                                                  |          |     |             |
|--------|------------------------------------------------------------------------------------------------------------------|----------|-----|-------------|
| P62979 | RNA-binding protein 14 OS=Homo sapiens GN=RBM14 PE=1 SV=2                                                        | 1.35E+05 | N   | 0.876663776 |
| Q9Y277 | Small nuclear ribonucleoprotein F OS=Homo sapiens GN=SNRPF PE=1 SV=1                                             | 1.33E+05 | N/C | 0.507436748 |
| P37837 | Splicing factor 1 OS=Homo sapiens GN=SF1 PE=1 SV=4                                                               | 1.33E+05 | N   | 0.940122063 |
| P33992 | U5 small nuclear ribonucleoprotein 40 kDa protein OS=Homo sapiens GN=SNRNP40 PE=1 SV=1                           | 1.29E+05 | N   | 0.925445362 |
| O00410 | Splicing factor 3B subunit 3 OS=Homo sapiens GN=SF3B3 PE=1 SV=4                                                  | 1.27E+05 | N   | 0.873294752 |
| Q16643 | Double-stranded RNA-binding protein Staufien homolog 1 OS=Homo sapiens GN=STAU1 PE=1 SV=2                        | 1.27E+05 | C   | 0.047834417 |
| O00764 | U2 small nuclear ribonucleoprotein A' OS=Homo sapiens GN=SNRPA1 PE=1 SV=2                                        | 1.25E+05 | N   | 0.903400035 |
| Q99417 | Signal recognition particle 9 kDa protein OS=Homo sapiens GN=SRP9 PE=1 SV=2                                      | 1.22E+05 | N/C | 0.519075265 |
| Q9BVK6 | Splicing factor 3B subunit 5 OS=Homo sapiens GN=SF3B5 PE=1 SV=1                                                  | 1.21E+05 | N   | 0.94142272  |
| O60884 | ATP-dependent RNA helicase DDX39 OS=Homo sapiens GN=DDX39 PE=1 SV=2                                              | 1.20E+05 | N/C | 0.50*       |
| Q9UNS2 | KH domain-containing, RNA-binding, signal transduction-associated protein 1 OS=Homo sapiens GN=KHDRBS1 PE=1 SV=1 | 1.18E+05 | N   | 0.953165406 |
| P55786 | U5 small nuclear ribonucleoprotein 200 kDa helicase OS=Homo sapiens GN=SNRNP200 PE=1 SV=2                        | 1.14E+05 | N   | 0.627630737 |
| Q04637 | Splicing factor 3A subunit 3 OS=Homo sapiens GN=SF3A3 PE=1 SV=1                                                  | 1.03E+05 | N   | 0.909791131 |
| O43583 | Caprin-1 OS=Homo sapiens GN=CAPRIN1 PE=1 SV=2                                                                    | 1.01E+05 | C   | 0.047960769 |
| Q9H9B4 | Zinc finger protein 326 OS=Homo sapiens GN=ZNF326 PE=1 SV=2                                                      | 9.89E+04 | N   | 0.912747797 |
| Q92688 | Eukaryotic translation initiation factor 4B OS=Homo sapiens GN=EIF4B PE=1 SV=2                                   | 9.51E+04 | C   | 0.058008158 |
| Q07960 | H/ACA ribonucleoprotein complex subunit 4 OS=Homo sapiens GN=DKC1 PE=1 SV=3                                      | 9.35E+04 | N   | 0.941453753 |
| P49591 | U6 snRNA-associated Sm-like protein LSm3 OS=Homo sapiens GN=LSM3 PE=1 SV=2                                       | 9.00E+04 | N   | 0.749312101 |
| O00154 | RNA-binding protein PNO1 OS=Homo sapiens GN=PNO1 PE=1 SV=1                                                       | 8.71E+04 | N   | 0.702399262 |
| Q9Y4L1 | Vigilin OS=Homo sapiens GN=HDLBP PE=1 SV=2                                                                       | 8.26E+04 | C   | 0.070605354 |
| O75223 | Splicing factor, arginine/serine-rich 7 OS=Homo sapiens GN=SFRS7 PE=1 SV=1                                       | 7.77E+04 | N   | 0.919065476 |
| Q7L5N1 | Insulin-like growth factor 2 mRNA-binding protein 2 OS=Homo sapiens GN=IGF2BP2 PE=1 SV=2                         | 7.66E+04 | C   | 0.10*       |
| O60739 | Splicing factor 3B subunit 1 OS=Homo sapiens GN=SF3B1 PE=1 SV=3                                                  | 7.53E+04 | N   | 0.941254351 |
| Q6P2Q9 | ATP-dependent RNA helicase DDX19A OS=Homo sapiens GN=DDX19A PE=1 SV=1                                            | 7.37E+04 | N   | 0.90*       |
| P36543 | Nucleoplasmin-3 OS=Homo sapiens GN=NPM3 PE=1 SV=3                                                                | 7.35E+04 | N   | 0.958507289 |
| Q96DG6 | Pre-mRNA-processing-splicing factor 8 OS=Homo sapiens GN=PRPF8 PE=1 SV=2                                         | 7.34E+04 | N/C | 0.533325208 |
| Q9BRT6 | Pre-mRNA-splicing factor SPF27 OS=Homo sapiens GN=BCAS2 PE=1 SV=1                                                | 7.31E+04 | N   | 0.886477083 |
| Q9UBX3 | Fragile X mental retardation syndrome-related protein 1 OS=Homo sapiens GN=FXR1 PE=1 SV=3                        | 6.83E+04 | C   | 0.076145031 |
| Q92597 | Splicing factor 3B subunit 2 OS=Homo sapiens GN=SF3B2 PE=1 SV=1                                                  | 6.75E+04 | N   | 0.950093854 |
| Q99661 | Protein LSM14 homolog B OS=Homo sapiens GN=LSM14B PE=1 SV=1                                                      | 6.35E+04 | C   | 0.041273789 |
| P46926 | Protein quaking OS=Homo sapiens GN=QKI PE=1 SV=1                                                                 | 5.48E+04 | C   | 0.10*       |
| Q9UHB9 | Heterogeneous nuclear ribonucleoprotein L-like OS=Homo sapiens GN=HNRPLL PE=1 SV=1                               | 5.39E+04 | N   | 0.765734746 |
| Q9Y4Z0 | Splicing factor U2AF 35 kDa subunit OS=Homo sapiens GN=U2AF1 PE=1 SV=3                                           | 5.21E+04 | N   | 0.958807281 |
| Q96AY3 | U1 small nuclear ribonucleoprotein 70 kDa OS=Homo sapiens GN=SNRNP70 PE=1 SV=2                                   | 5.21E+04 | N   | 0.754910219 |
| Q9Y2W2 | U6 snRNA-associated Sm-like protein LSm4 OS=Homo sapiens GN=LSM4 PE=1 SV=1                                       | 5.19E+04 | N   | 0.782474829 |
| P50579 | Heterogeneous nuclear ribonucleoprotein U-like protein 2 OS=Homo sapiens GN=HNRNPUL2 PE=1 SV=1                   | 4.84E+04 | N   | 0.890405066 |
| O43491 | Zinc finger RNA-binding protein OS=Homo sapiens GN=ZFR PE=1 SV=2                                                 | 4.81E+04 | N   | 0.969909775 |
| Q9BV57 | Ribonucleoprotein PTB-binding 1 OS=Homo sapiens GN=RAVER1 PE=1 SV=1                                              | 4.80E+04 | N   | 0.90*       |
| P21964 | Putative RNA-binding protein Luc7-like 2 OS=Homo sapiens GN=LUC7L2 PE=1 SV=2                                     | 4.54E+04 | N   | 0.941553621 |

\*We were unable to find the corresponding Gene in Wuhr et al., (2015). Therefore, we assigned values of 0.1, 0.5, or 0.9 if the protein is known to be enriched in the cytoplasm, neither enriched nor depleted in cytoplasm and nucleus, or enriched in the nucleus respectively.

\*\* We found a gene that is called differently in Wuhr et al., (2015) that should be a homolog to the human gene.

\*\*\* N = Predominantly Nucleus (>0.60). C = Predominantly Cytoplasm (<0.40). N/C = In both compartments (0.4-0.6)
